# Supplementary material
Source: MDPI journal article supplement (https://www.mdpi.com/2073-4395/10/5/656)
Supplement: s1 [file s1]

Supplementary material

Ecotype ET Leaf metabolite changes in response to salt and nitrogen forms

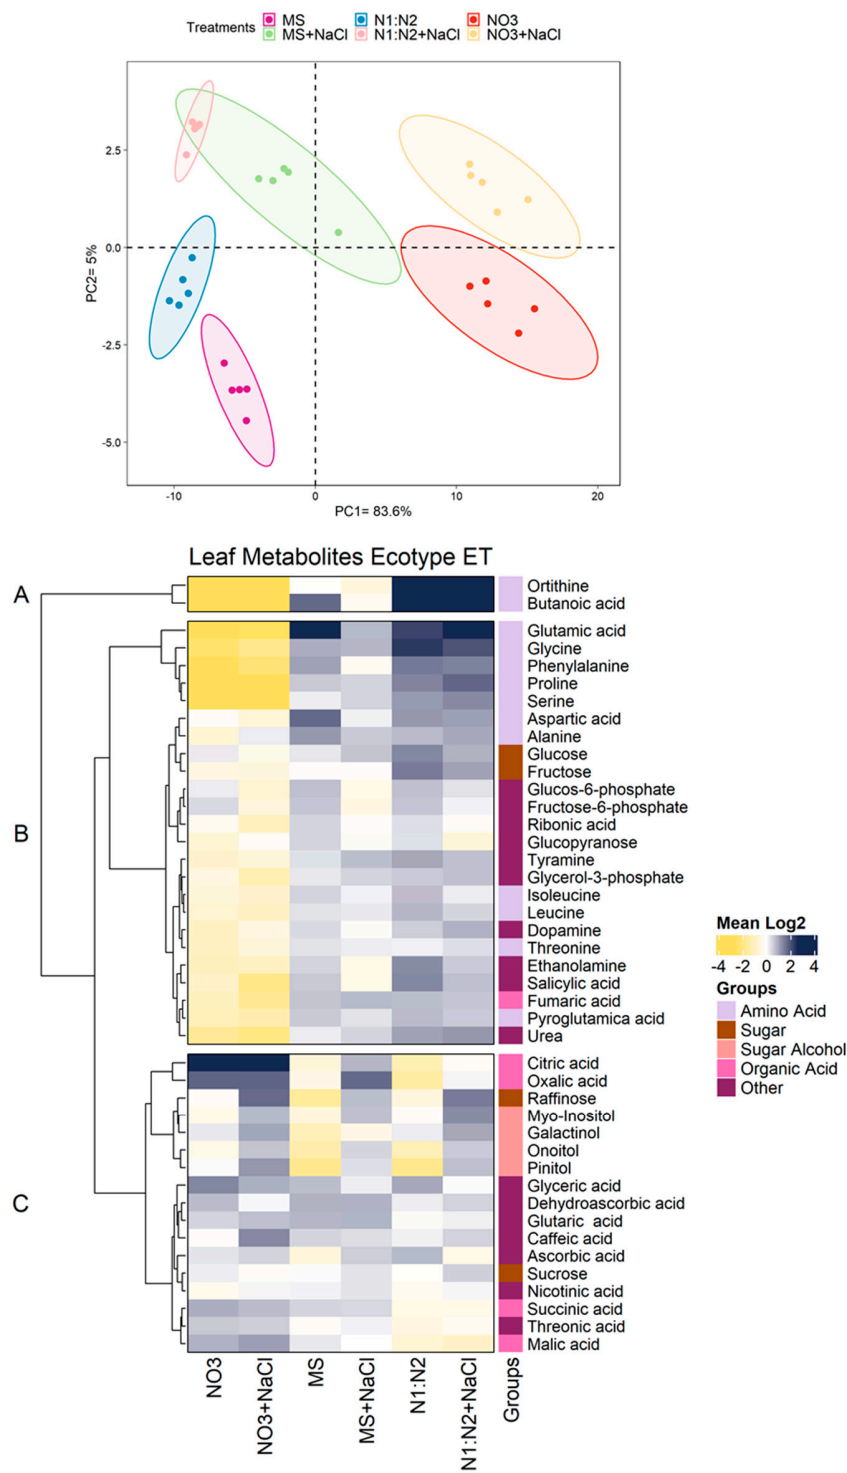

Supplementary Figure 1 (A). PCA plot analysis of leaf metabolomic profile of ecotype ET, each dot represents one biological sample. Treatments were a factorial combination of  $\text{NO}_3^-:\text{NH}_4^+$  ratios (100:0, 66:33 and 25:75) and two levels of salinity (0, 50 mM NaCl). (B) heat map analysis of GC-MS metabolomics, legend ( $\text{NO}_3=100:0$ ,  $\text{NO}_3+\text{NaCl}$  100:0 + 50 mM NaCl; MS = 66:33, MS+NaCl = 66:33 + 50 mM NaCl ; N1:N2 = 25:75 , N1:N2+NaCl = 25:75 + 50 mM NaCl. The rows show metabolites and the columns represent the samples. Metabolites that were significantly decreased are displayed dark blue, while metabolites that were significantly increased are displayed yellow.

Ecotype RN Leaf metabolite changes in response to salt and nitrogen forms

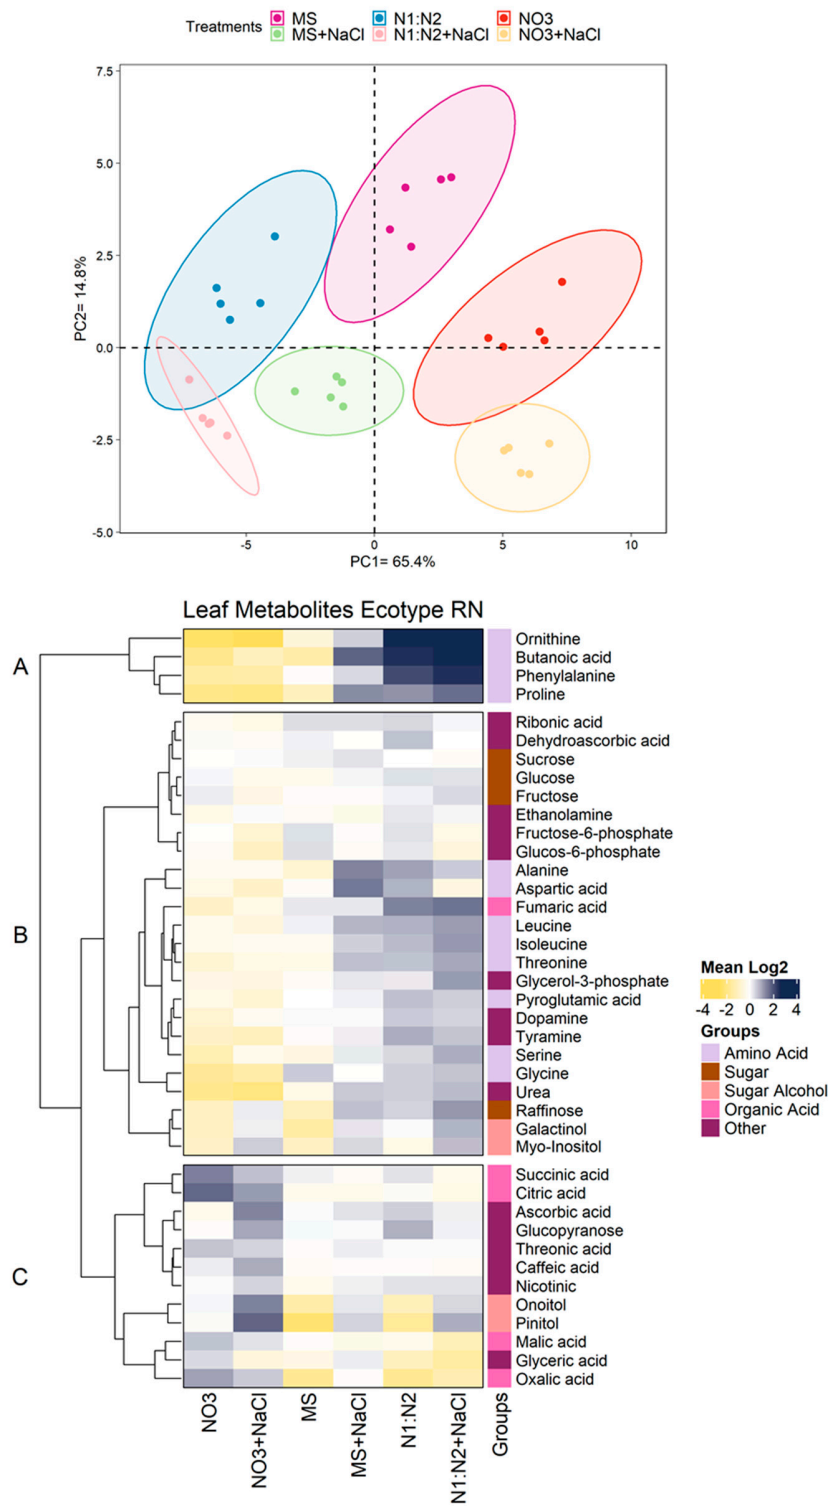

Supplementary Figure 2 (A). PCA plot analysis of leaf metabolomic profile of ecotype RN, each dot represents one biological sample. Treatments were a factorial combination of  $\text{NO}_3^-:\text{NH}_4^+$  ratios (100:0, 66:33 and 25:75) and two levels of salinity (0, 50 mM NaCl). (B) heat map analysis of GC-MS metabolomics, legend ( $\text{NO}_3=100:0$ ,  $\text{NO}_3+\text{NaCl}$  100:0 + 50 mM NaCl; MS = 66:33, MS+NaCl = 66:33 + 50 mM NaCl ; N1:N2 = 25:75 , N1:N2+NaCl = 25:75 + 50 mM NaCl. The rows show metabolites and the columns represent the samples. Metabolites that were significantly decreased are displayed dark blue, while metabolites that were significantly increased are displayed yellow.
